# Supplementary material for: Acute control of the sleep switch in Drosophila reveals a role for gap junctions in regulating behavioral responsiveness
Source: eLife journal article supplement (doi:10.7554/elife.37105), 2018-08-15

A

1 Hz Light  
Pulse Stimulus

5 mV

1 s

R23E10-Gal4 >  
UAS-CsChrimson + ATRR23E10-Gal4 >  
UAS-CsChrimson + ATR

23E10-Gal4/+ with ATR

1 Hz Light Pulse

2 mV

5 mV

5 mV

B

R23E10-Gal4/+ with ATR

R23E10-Gal4 >  
UAS-CsChrimson + ATR

\*\*\*\*

10 mV

 $\Delta V_m$ Pre  
Stim1 Hz  
Light StimPost  
Stim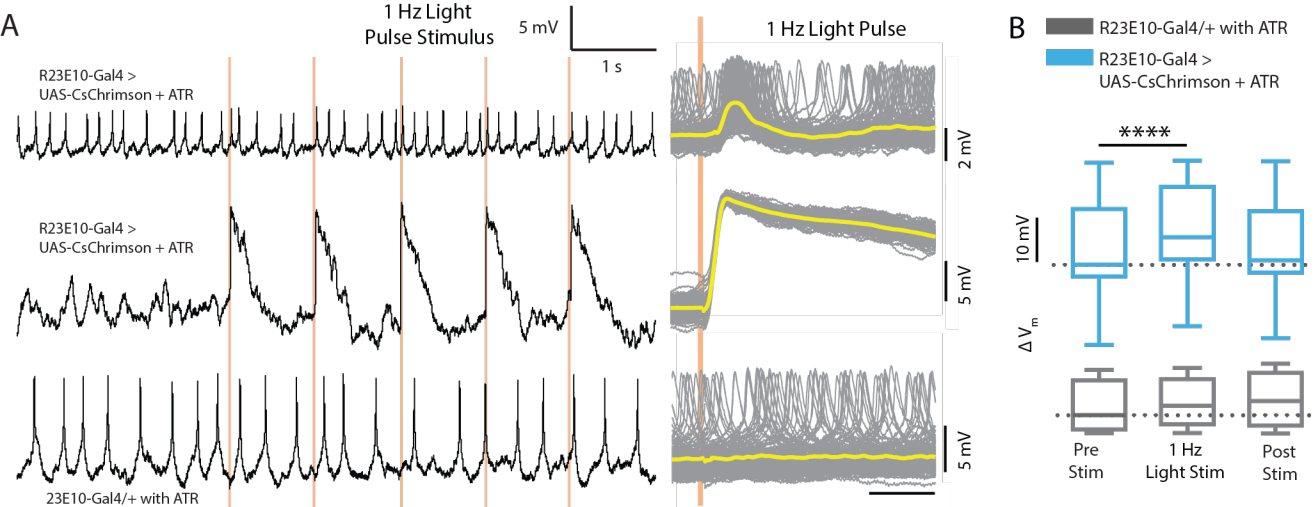

Supplement: supp [file elife-37105-supp-v1.zip]
