# Supplementary material for: Acute control of the sleep switch in Drosophila reveals a role for gap junctions in regulating behavioral responsiveness
Source: eLife journal article supplement (doi:10.7554/elife.37105), 2018-08-15

1 Hz Light Pulse

Evoked spikes

2° Evoked spikes

3° Evoked spikes

R23E10-Gal4 > UAS-CsChrimson with ATR

R23E10-Gal4/+ with ATR

R23E10-Gal4 >  
UAS-CsChrimson  
with no ATR

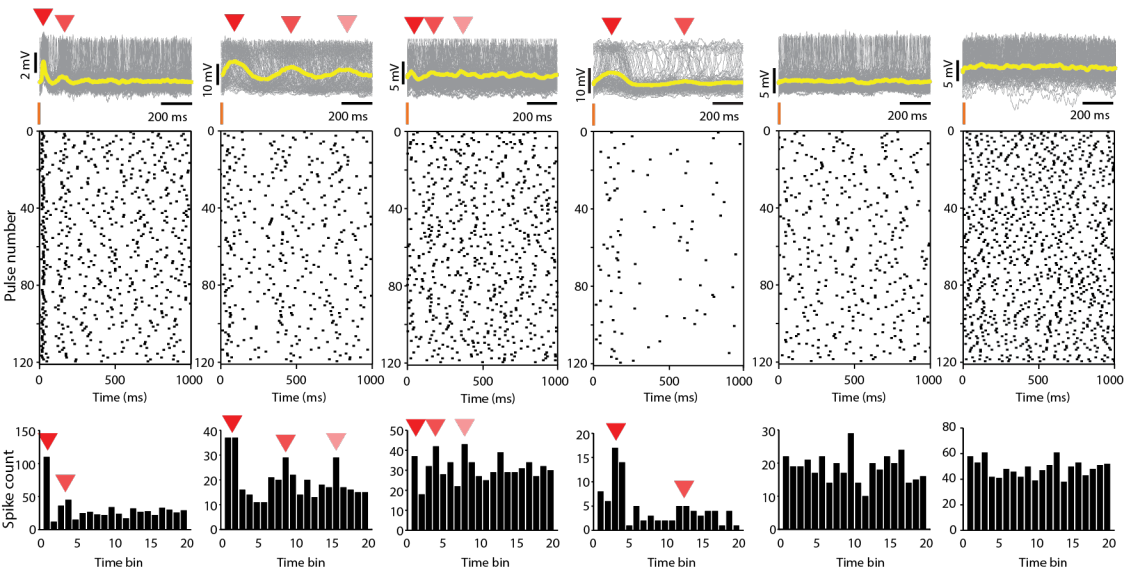

Supplement: supp [file elife-37105-supp-v1.zip]
