# Supplementary figures and images for: Acute control of the sleep switch in Drosophila reveals a role for gap junctions in regulating behavioral responsiveness
Source: eLife journal article supplement (doi:10.7554/elife.37105), 2018-08-15

A

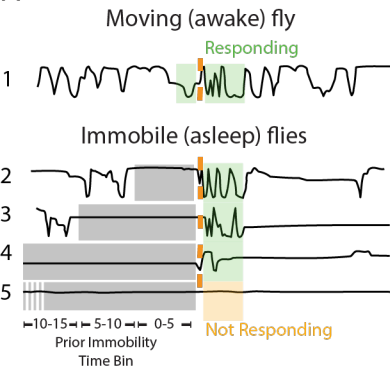

B

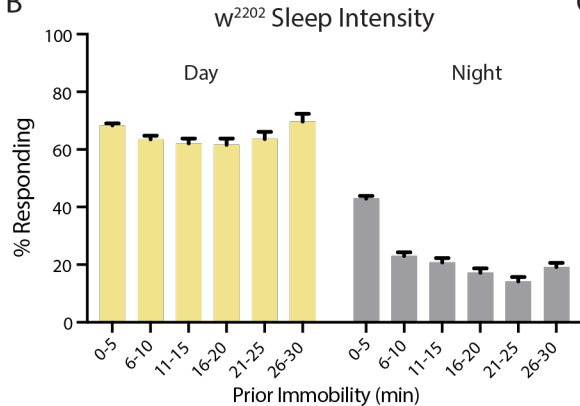

C

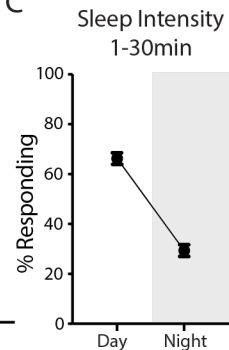

D

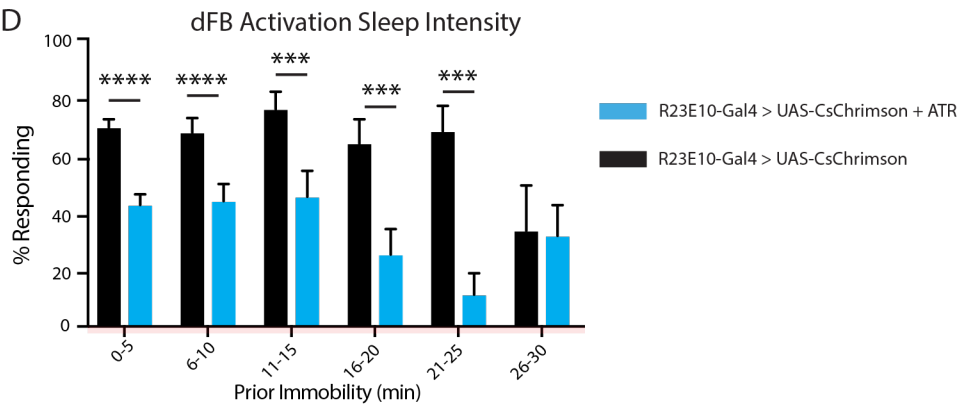

Supplement: supp [file elife-37105-supp-v1.zip]

A

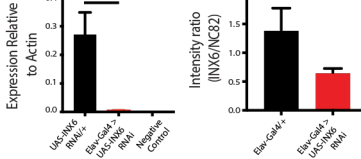

B

Intensity ratio  
(INX6/NC82)

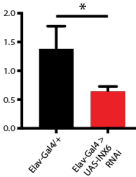

Supplement: supp [file elife-37105-supp-v1.zip]

1 Hz Light Pulse

R23E10-Gal4 > UAS-CsChrimson,UAS-INX6 RNAi with ATR

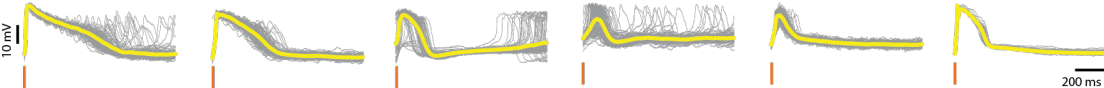

Supplement: supp [file elife-37105-supp-v1.zip]

A  $\alpha$ -INX6

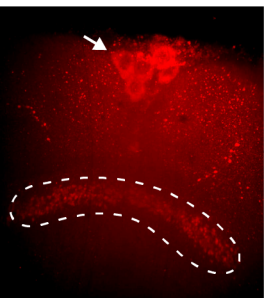

B  $\alpha$ -GFP  $\alpha$ -INX6

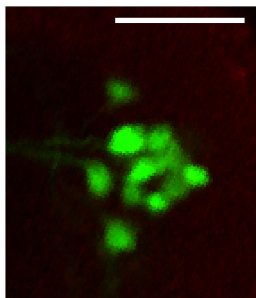

C GFP

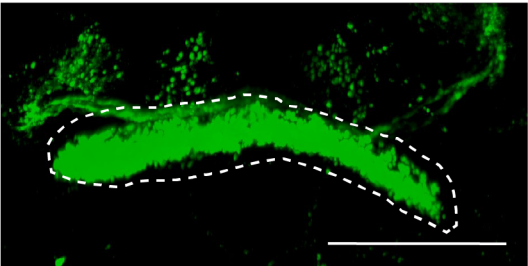

Neurobiotin

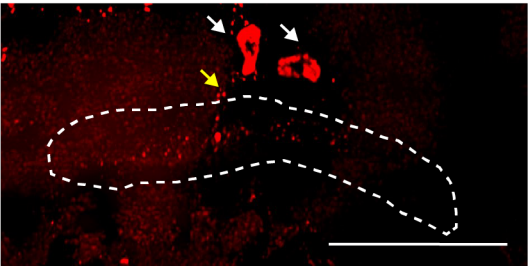

Merge

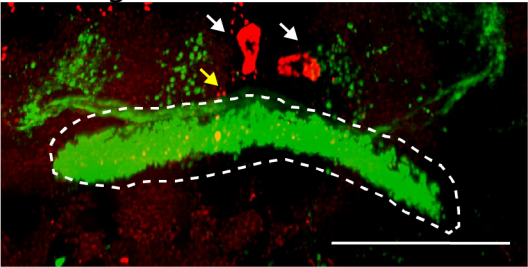

Supplement: supp [file elife-37105-supp-v1.zip]

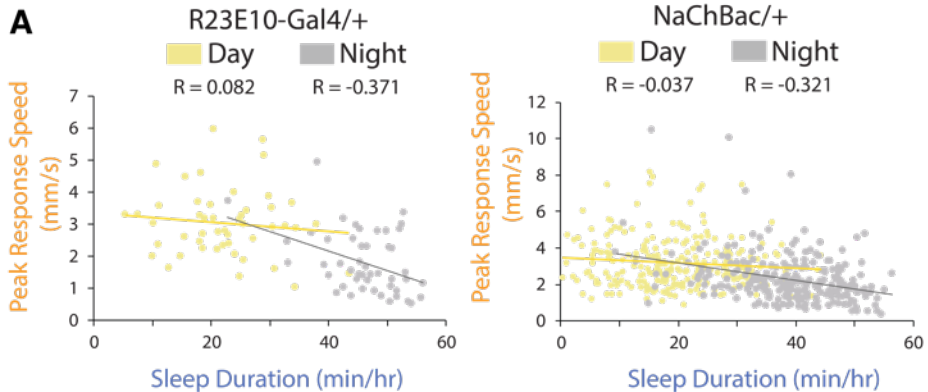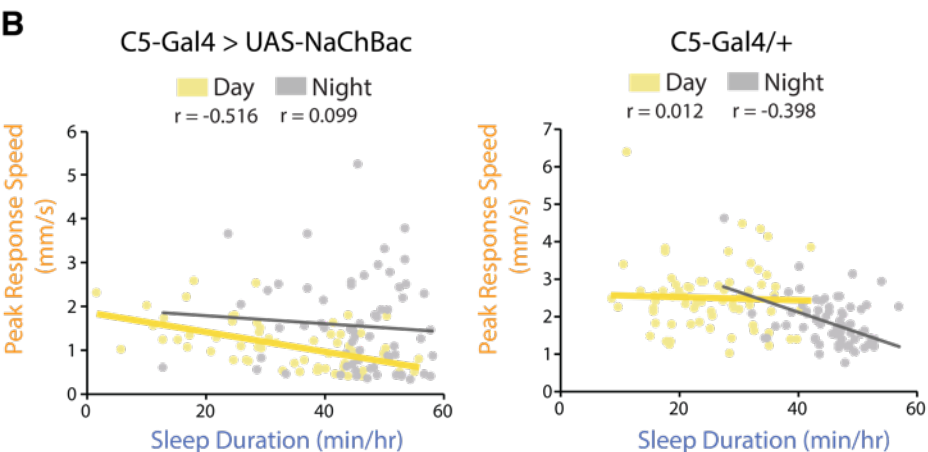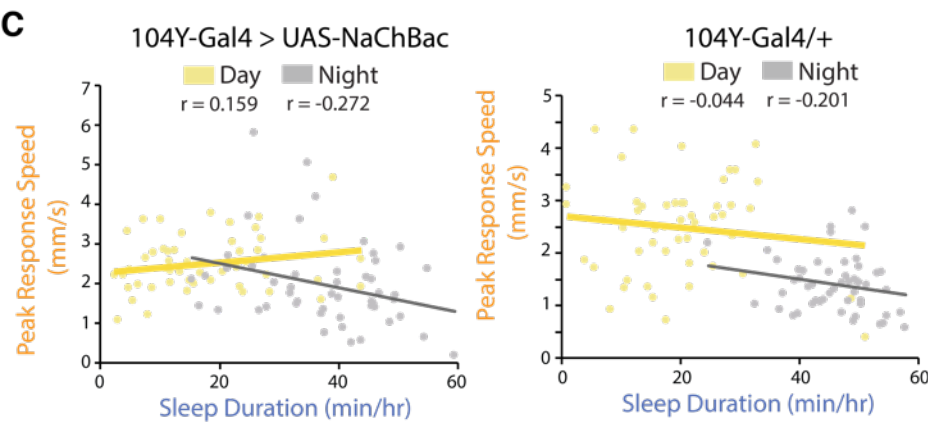

Supplement: supp [file elife-37105-supp-v1.zip]

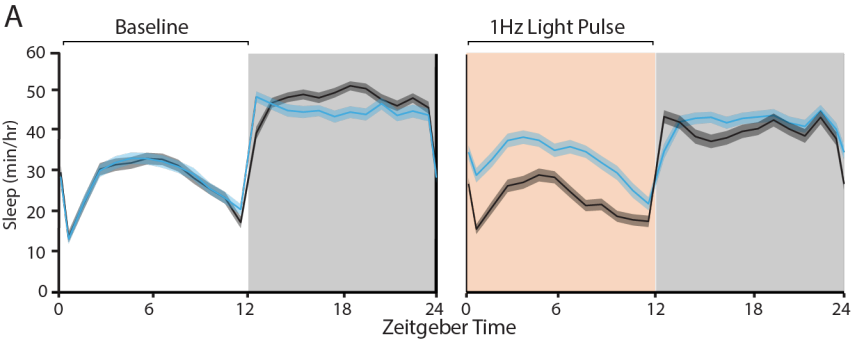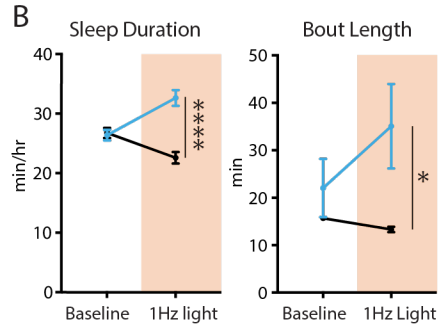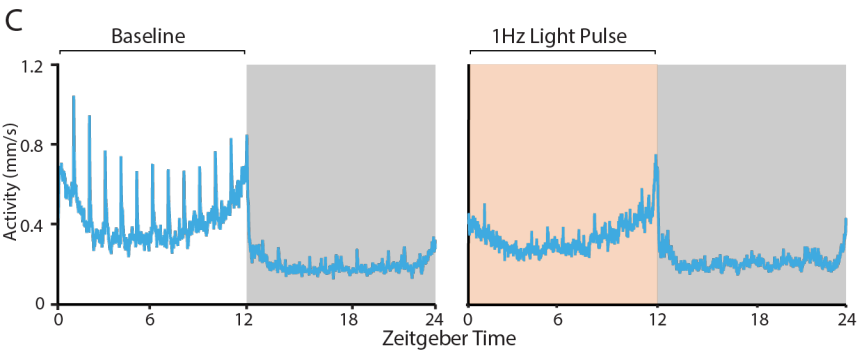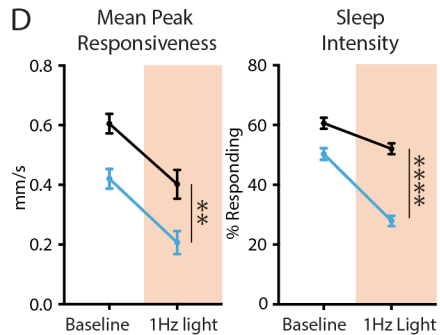

Supplement: supp [file elife-37105-supp-v1.zip]

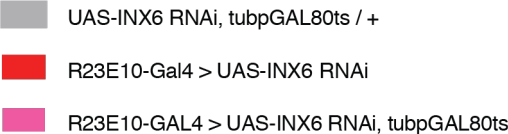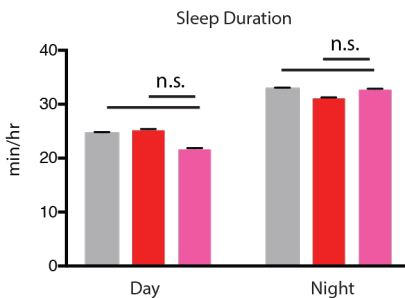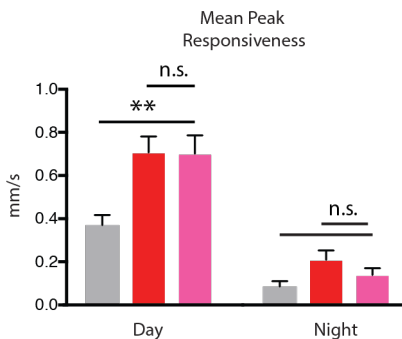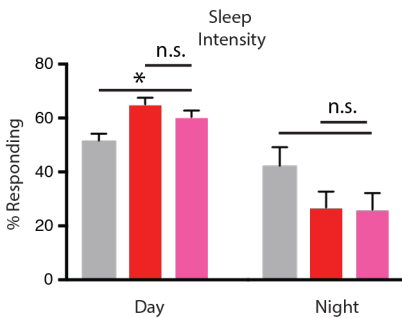

Supplement: supp [file elife-37105-supp-v1.zip]

■ R23E10-Gal4 > UAS-CsChrimson

■ R23E10-Gal4 > UAS-CsChrimson + ATR

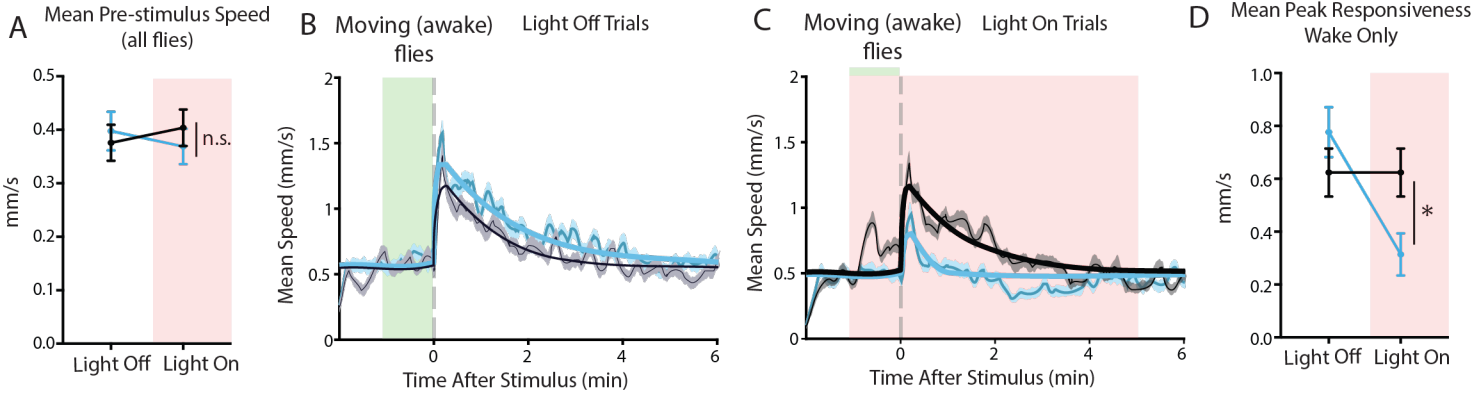

Supplement: supp [file elife-37105-supp-v1.zip]

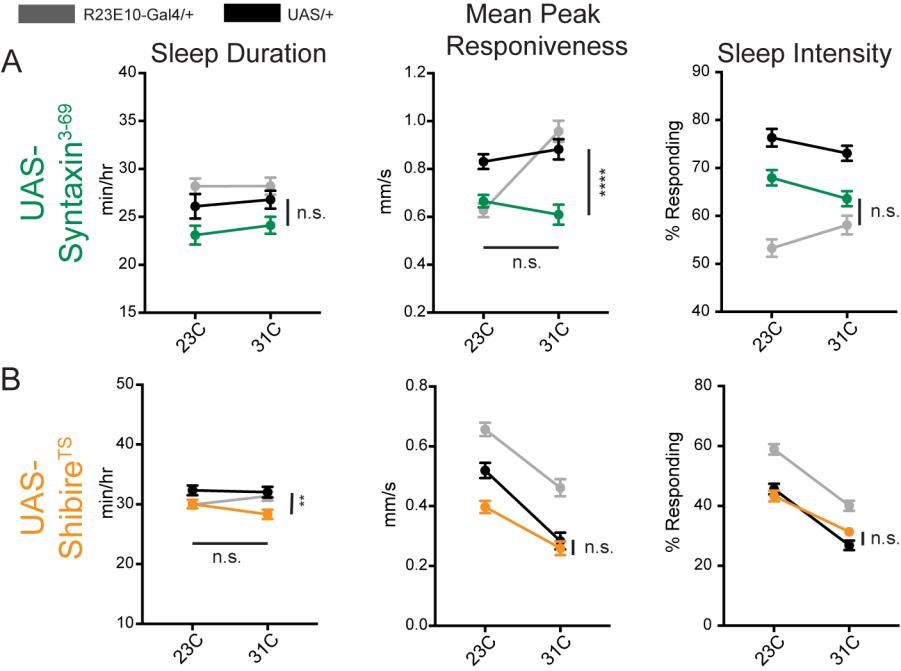

Supplement: supp [file elife-37105-supp-v1.zip]
